# Supplementary material
Source: PubMed Central journal article supplement (PMC6286225)

Figure S1

**a**

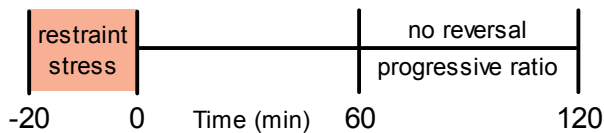

**b**

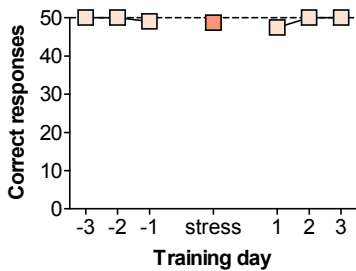

**c**

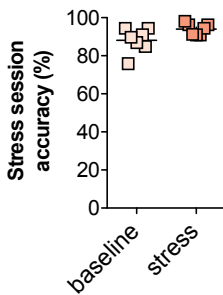

**d**

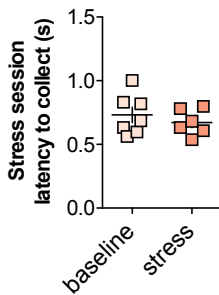

**e**

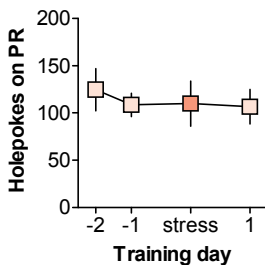

**f**

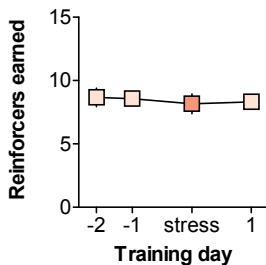

**g**

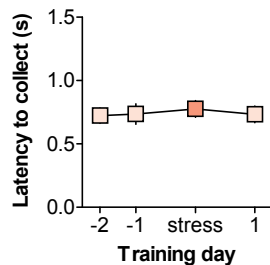

Supplement: NIHMS1510142-supplement-1.pdf [file NIHMS1510142-supplement-1.pdf]

# a Figure S2

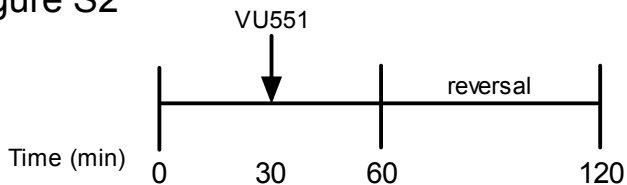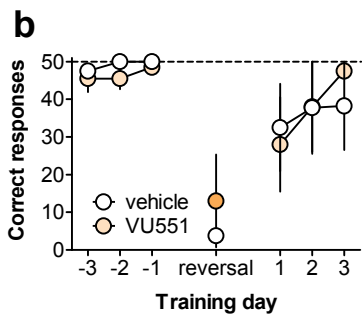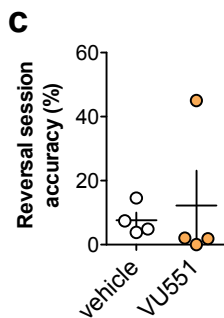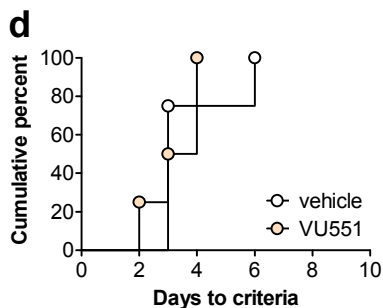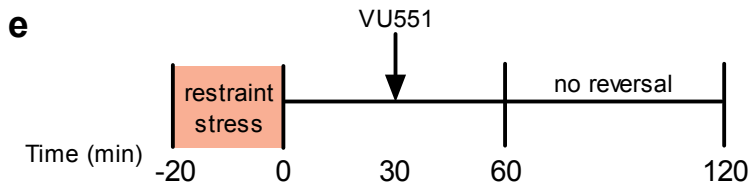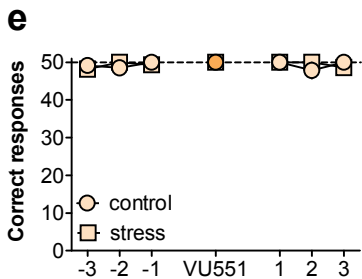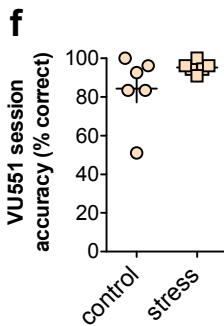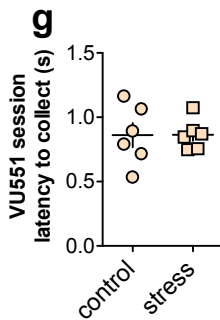

Supplement: NIHMS1510142-supplement-2.pdf [file NIHMS1510142-supplement-2.pdf]
